# Supplementary material
Source: PubMed Central journal article supplement (PMC6077709)
Supplement: pnas.1806640115.sapp.pdf [file pnas.1806640115.sapp.pdf]

Supplementary Information for

**Wafer-recyclable, environment-friendly transfer printing for large-scale thin-film nanoelectronics**

Dae Seung Wie<sup>a,1</sup>, Yue Zhang<sup>b,1</sup>, Min Ku Kim<sup>a</sup>, Bongjoong Kim<sup>a</sup>, Sangwook Park<sup>c</sup>, Young-Joon Kim<sup>d</sup>, Pedro P. Irazoqui<sup>d,e,f</sup>, Xiaolin Zheng<sup>c</sup>, Baoxing Xu<sup>b,2</sup>, Chi Hwan Lee<sup>a,e,f,2</sup>

<sup>a</sup>School of Mechanical Engineering, Purdue University, West Lafayette, IN 47907; <sup>b</sup>Department of Mechanical and Aerospace Engineering, University of Virginia, Charlottesville, VA 22903; <sup>c</sup>Department of Mechanical Engineering, Stanford University, Stanford, CA 94305; <sup>d</sup>School of Electrical and Computer Engineering, Purdue University, West Lafayette, IN 47907 <sup>e</sup>Center for Implantable Devices, Purdue University, West Lafayette, IN 47907 <sup>f</sup>Weldon School of Biomedical Engineering, Purdue University, West Lafayette, IN 47907

<sup>1</sup>D.S.W. and Y.Z. contributed equally to this work.

<sup>2</sup>To whom correspondence may be addressed. Email: [bx4c@virginia.edu](mailto:bx4c@virginia.edu) or [lee2270@purdue.edu](mailto:lee2270@purdue.edu).

**This PDF file includes:**

Supplementary Figure Legends  
Figs. S1 to S20

**Other supplementary materials for this manuscript include the following:**

Supplementary Movie Legends  
Movies S1 to S3

## SI Appendix Figure Captions

**Fig. S1.** SEM images of various kinds of nanomaterials used as model systems in this report, including Si NM (top left), MoS<sub>2</sub> monolayer (top right), Si NRs (bottom left), and Ag NW (bottom right). The scale bars are 60 μm, 150 μm, 160 μm, and 12 μm, respectively.

**Fig. S2.** Representative microscope images (scale bars: 400 μm) of the thin film nanoelectronics after the debonding process.

**Fig. S3.** Optical images (scale bar: 2.5 cm) of a SiO<sub>2</sub>/Si wafer that is recycled multiple times after the transfer printing processes.

**Fig. S4.** Optical images (scale bar: 2.5 cm) of a representative thin film nanoelectronics transferred from their fabrication SiO<sub>2</sub>/Si wafer onto the surface of a building window (A) and covered with a commercial sticker to conceal the electronics (B).

**Fig. S5.** Optical images (scale bar: 1.8 cm) of a donor SiO<sub>2</sub>/Si wafer (A) and a receiver thermally releasable tape (B) after the interfacial debonding process under dry air condition. The magnified views (scale bar: 350 μm) appear in the images on the bottom frame.

**Fig. S6.** A magnified view (scale bar: 1.5 cm) of a testbed sample placed in the loading stage of a custom-modified mechanical peeling apparatus used in this study.

**Fig. S7.** Experimental data of peeling strength as a function of peeling distance in water for varied peeling angles from 30° to 120° (A) and Ni thicknesses from 30 nm to 2.4 μm (B).

**Fig. S8.** Experimental data of steady-state peeling strength as a function of peeling rate in water.

**Fig. S9.** FEA results of maximum principle strain distribution in thin films at peeling distance of 1, 6, and 11 mm in water (A) and dry air conditions (B).

**Fig. S10.** FEA results of maximum principle strain distribution in thin films at peeling distance of 1, 6, and 11 mm in water for varied Ni thicknesses from 30 nm to 2.4 μm.

**Fig. S11.** (A) An optical image (scale bar: 8 mm) of a testbed sample that includes residues of materials after the interfacial debonding process in dry air condition. (B) The corresponding peeling strength-peeling distance curve.

**Fig. S12.** The corresponding linear and logarithmic scale of the transfer curves in Fig. 3B.

**Fig. S13.** Circuit diagrams of AND (left), OR (middle), and NOT (right) logic gates.

**Fig. S14.** The corresponding I-V and transfer curves to the n-MOSFETs in Fig. 4E.

**Fig. S15.** Calibration curves (A) and measured temperatures (B) for Si NRs-based p-i-n diode and control IR sensor.

**Fig. S16.** Raman spectra of as-prepared MoS<sub>2</sub> monolayer.

**Fig. S17.** Cross sectional schematic illustration of the hybrid photodiode that is comprised of Si NM and MoS<sub>2</sub> monolayer.

**Fig. S18.** Characterizations of a control hybrid photodiode built on a SiO<sub>2</sub>/Si wafer.

**Fig. S19.** FEA results of maximum principle strain distribution for the hybrid photodiode at peeling distance of 1, 6, and 11 mm in water.

**Fig. S20.** Schematic illustrations of bend deformation (A) and the corresponding moment-curvature relation for a peeling process of thin films (B).

## SI Appendix Movies

**Movie S1.** An experimental demonstration showing the interfacial debonding of a 4-inch wafer-size of thin film nanoelectronics in a water bath at room temperature.

**Movie S2.** An experimental demonstration showing the interfacial debonding process by using a custom-modified peeling apparatus.

**Movie S3.** An experimental demonstration displaying letters and images on a LED screen in a pre-programmed manner by exploiting the transferred Si NM-based MOSFETs-based switches on the side wall.

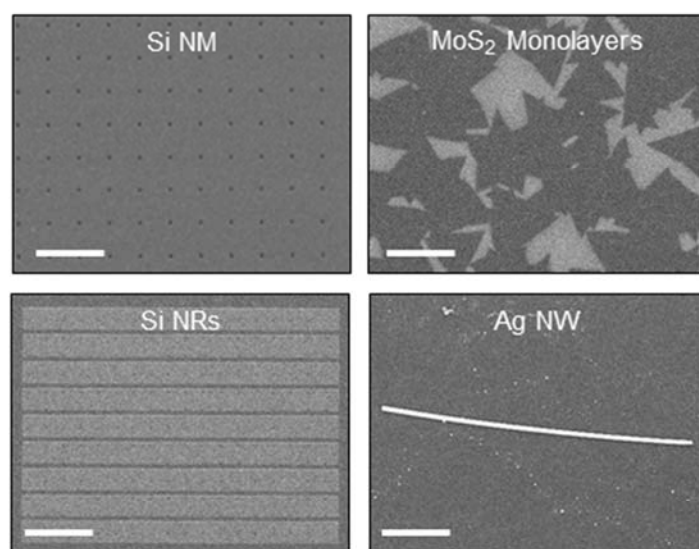

**Fig. S1**

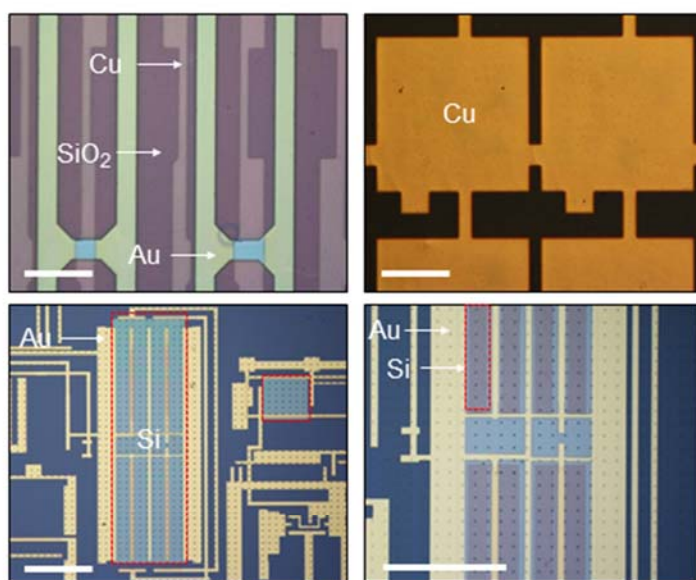

**Fig. S2**

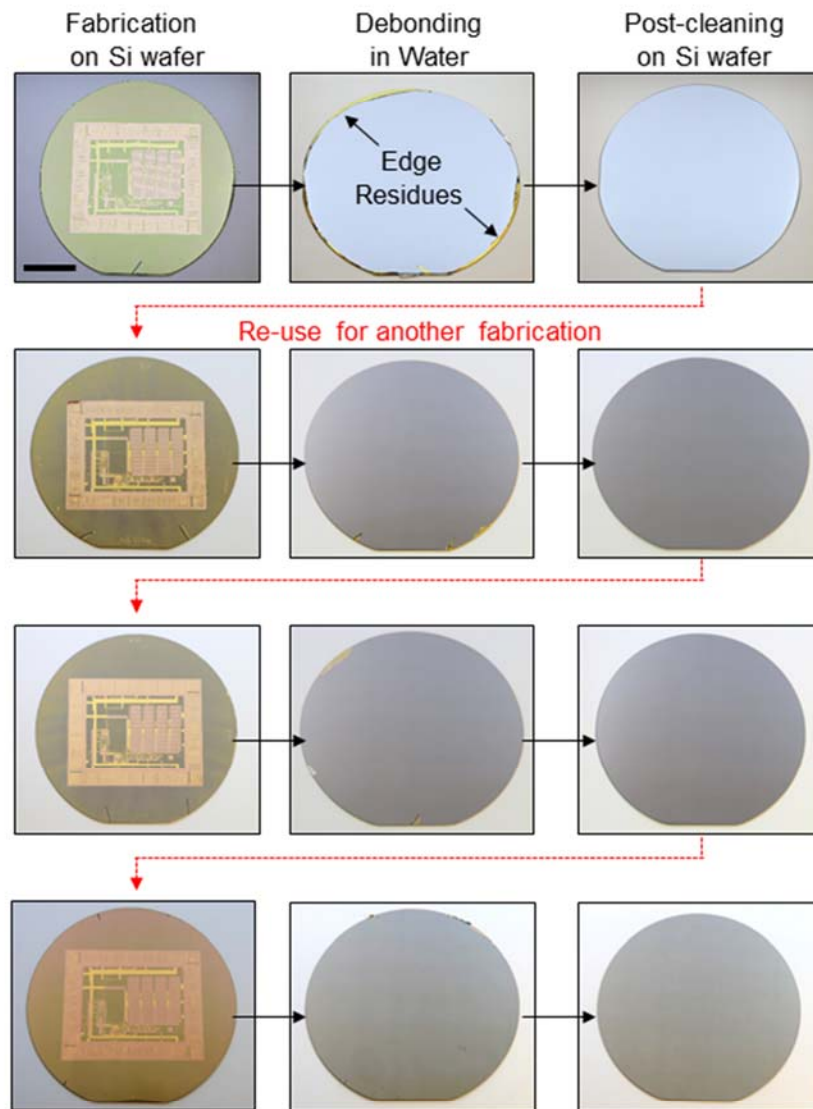

**Fig. S3**

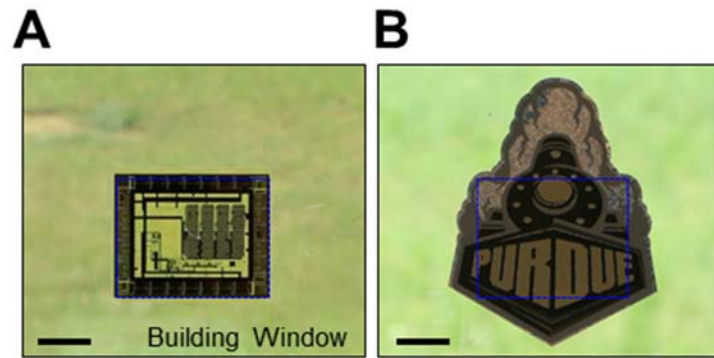

**Fig. S4**

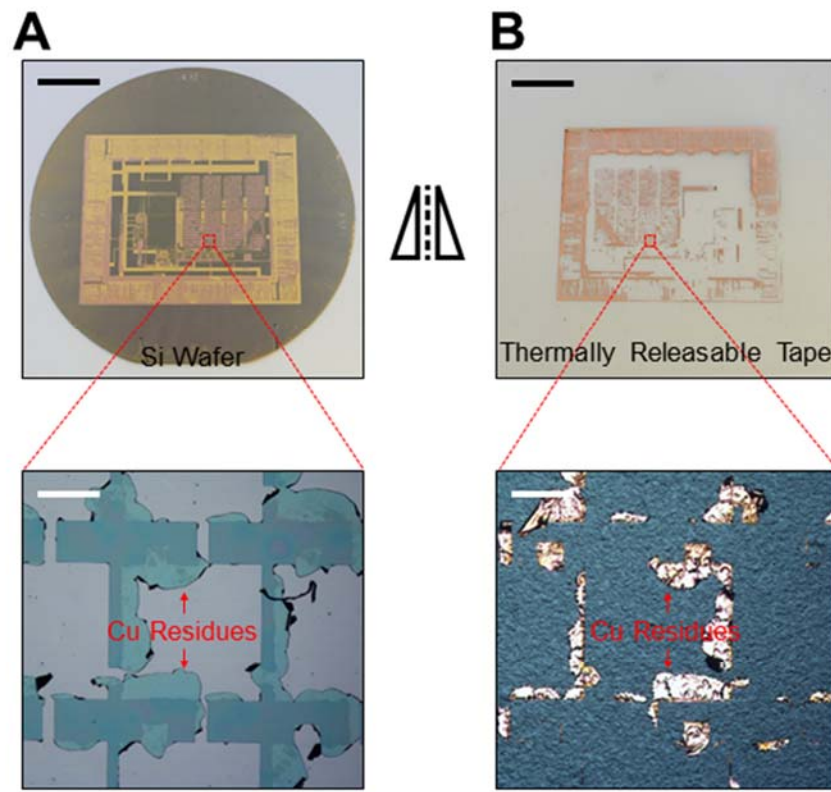

**Fig. S5**



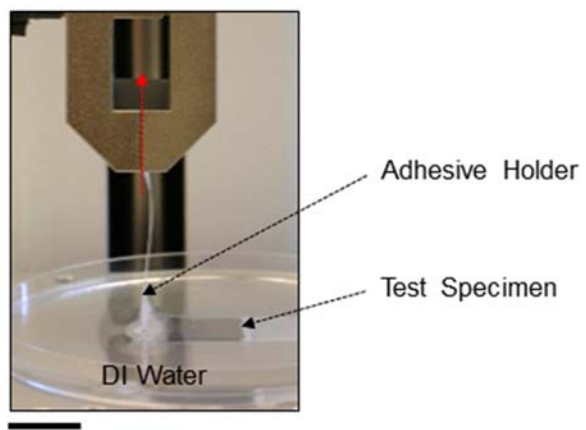

**Fig. S6**

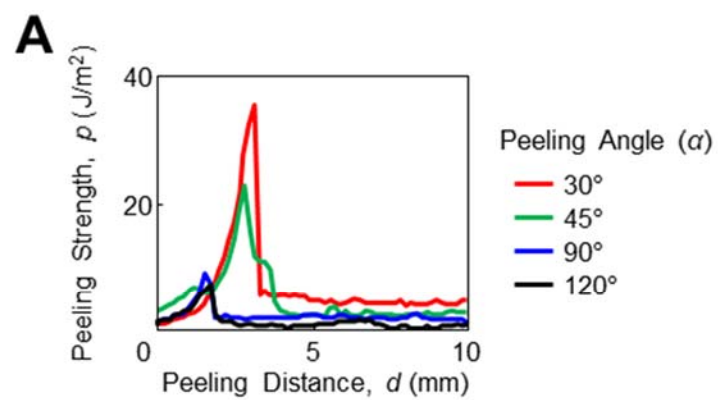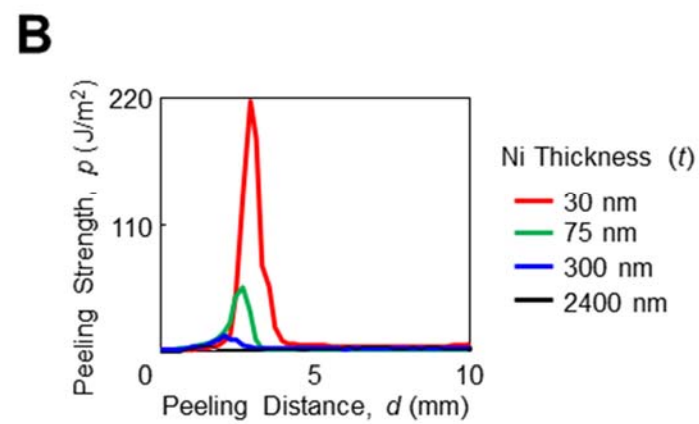

**Fig. S7**

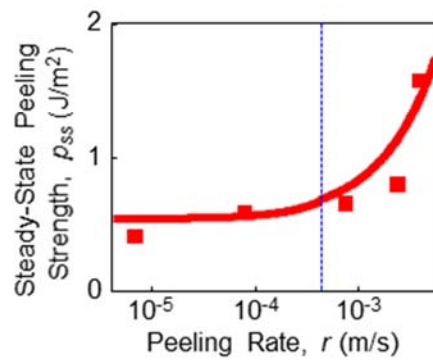

**Fig. S8**

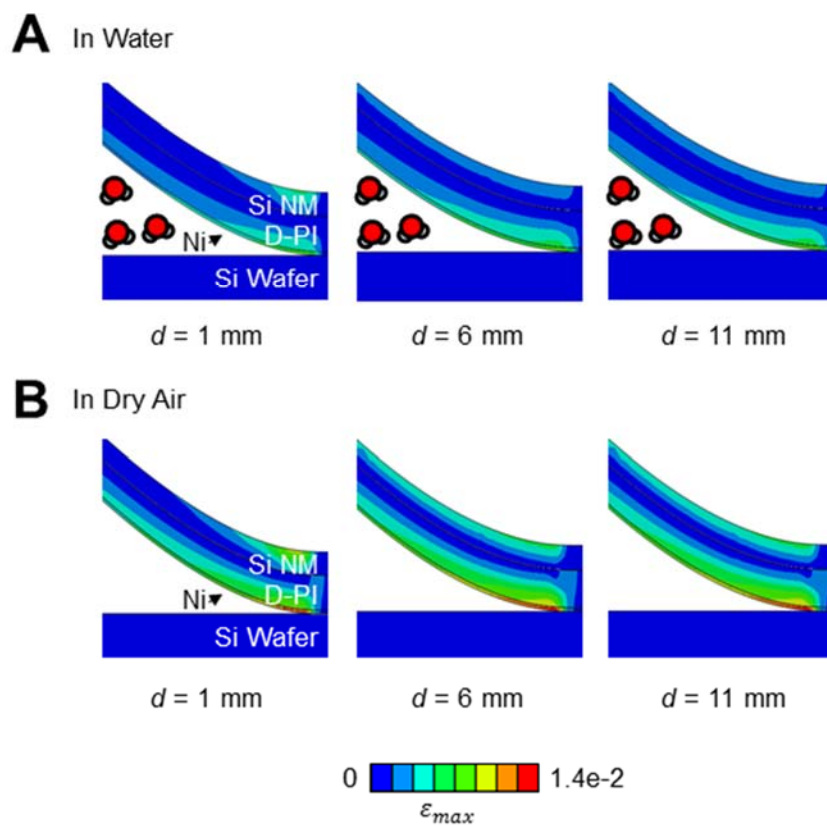

**Fig. S9**

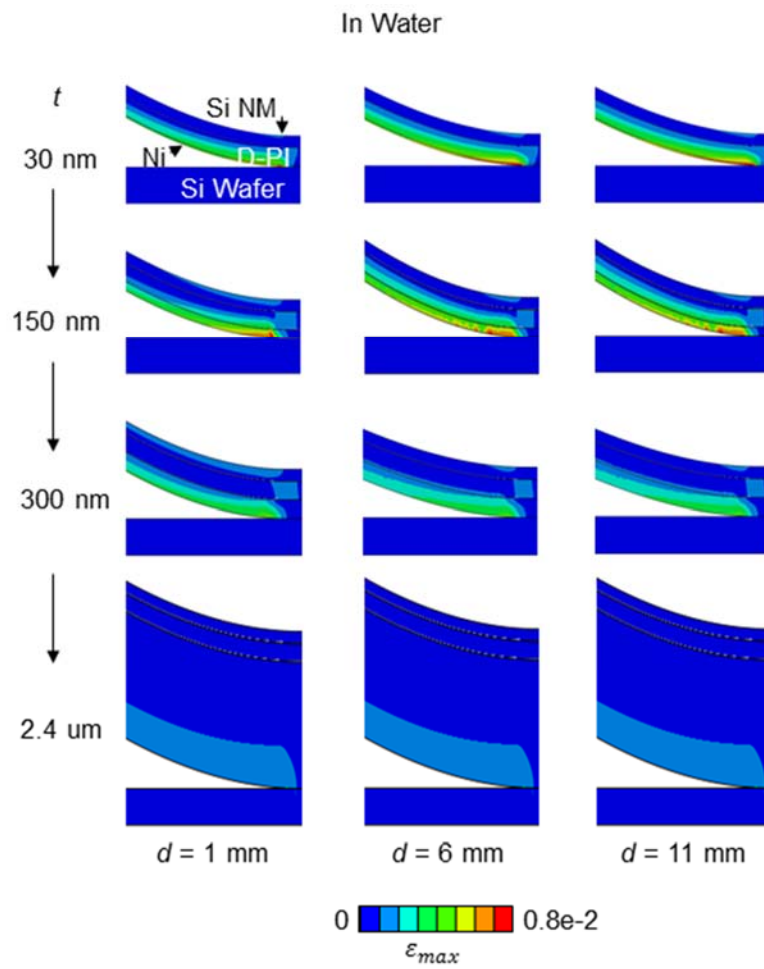

**Fig. S10**

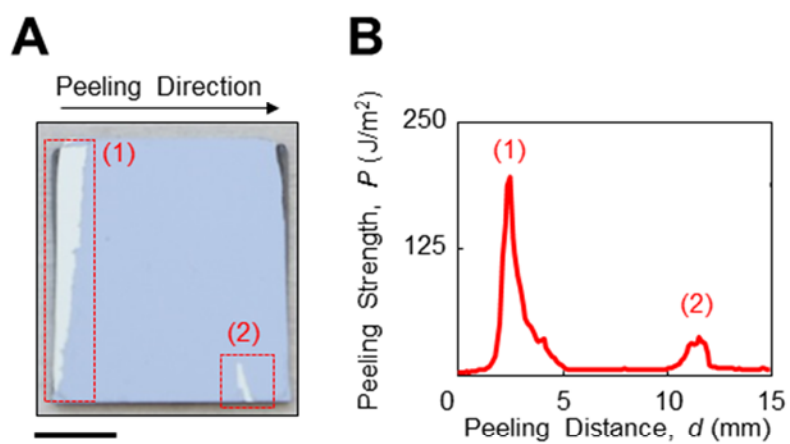

**Fig. S11**

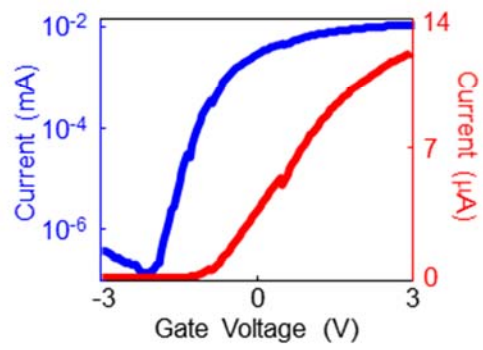

**Fig. S12**

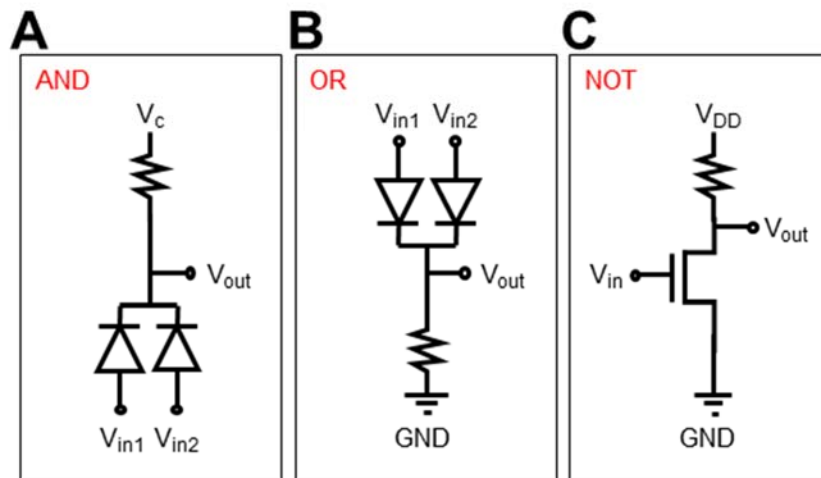

**Fig. S13**



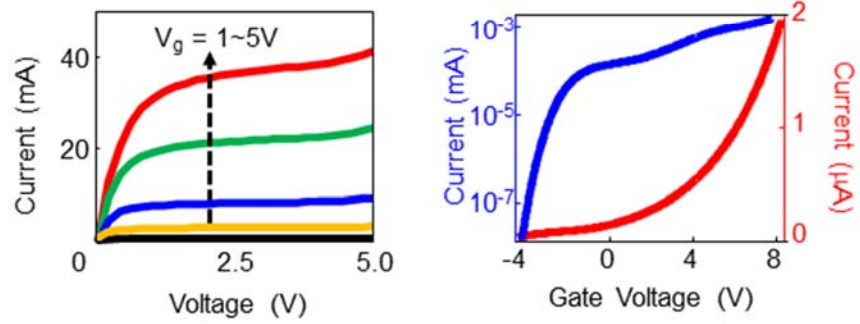

Fig. S14

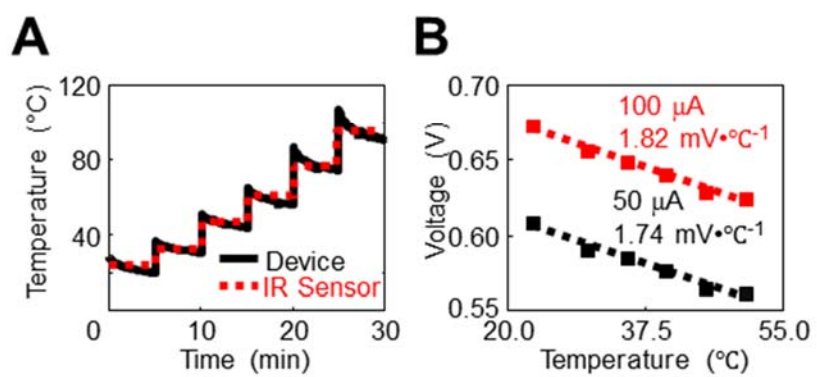

**Fig. S15**

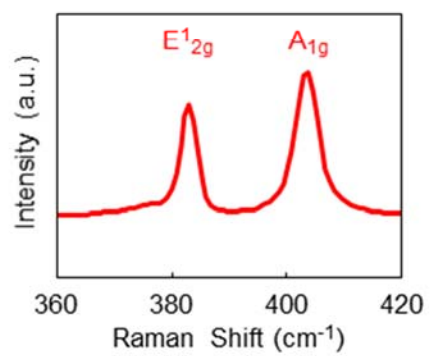

**Fig. S16**

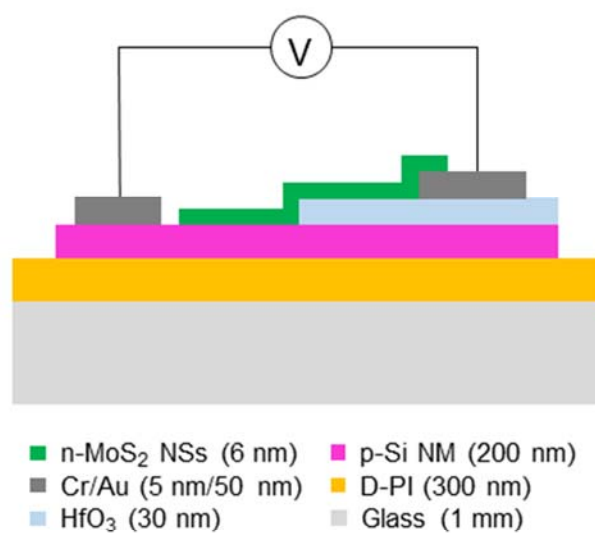

**Fig. S17**

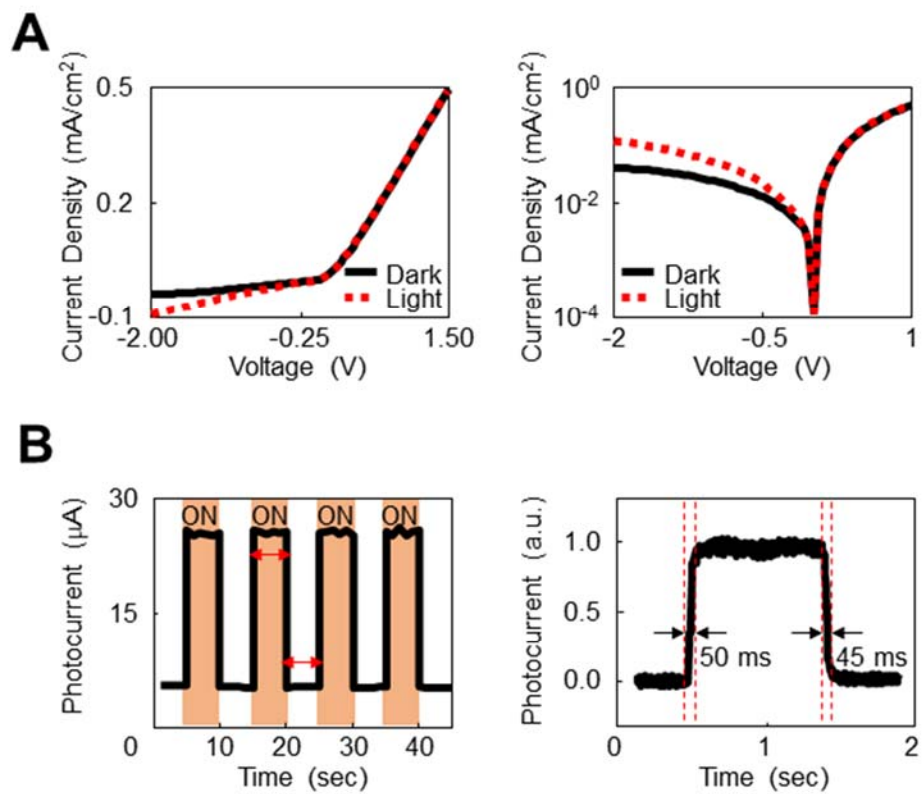

**Fig. S18**

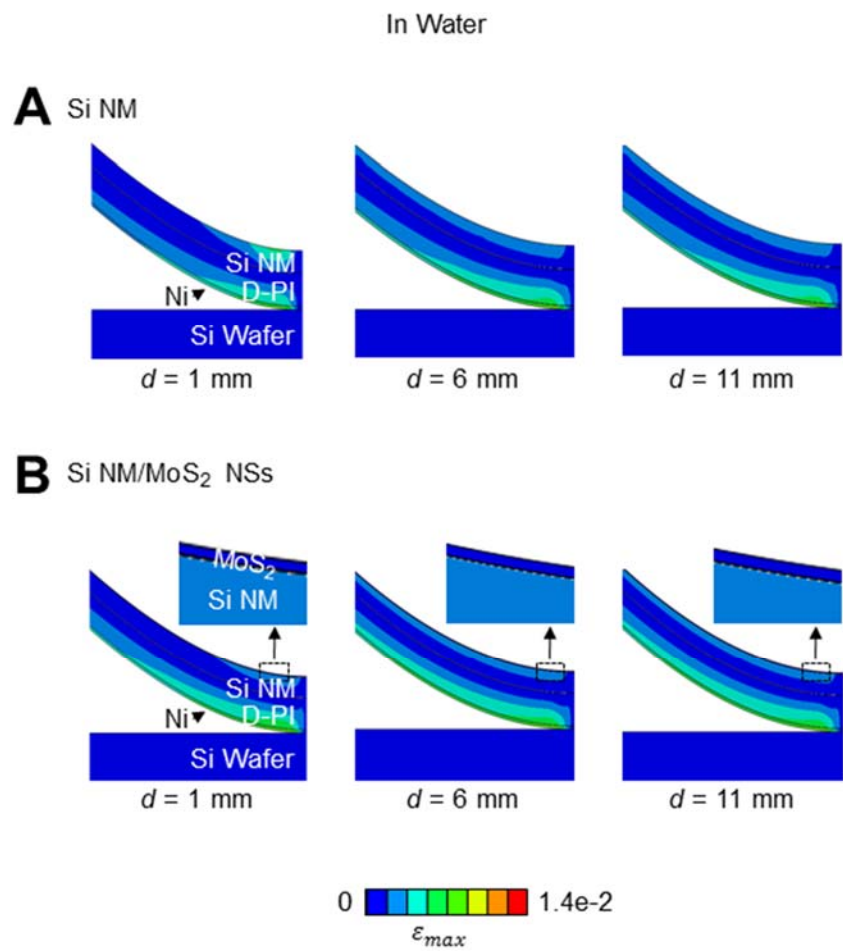

**Fig. S19**

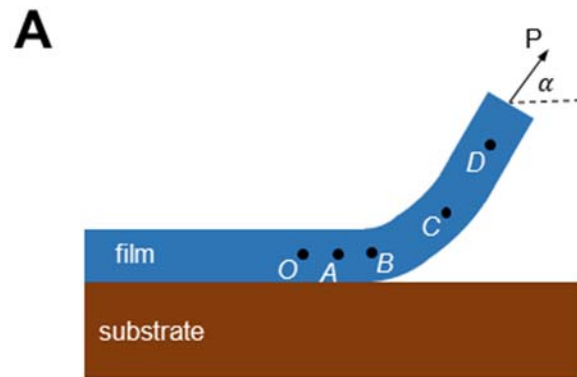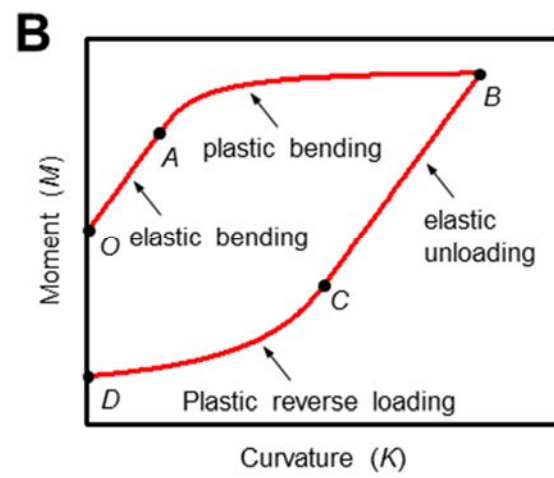

**Fig. S20**
